# Supplementary material
Source: publisher site journal article supplement (https://www.degruyterbrill.com/publication/isbn/978-3-486-71992-5/downloadAsset/9783486719925_Beispielprogramme.zip)
Supplement: Supplementary file 1 [file Guidelines.pdf › Guidelines.pdf]

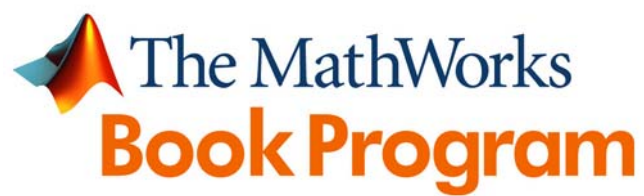

## **Book Development, Production, and Promotion Guidelines**

## Book Development, Production, and Promotion Guidelines

This document contains information and guidelines to help you plan, write, publish, and promote your book. While we recommend that you read through the guidelines at the beginning of your book development for a complete overview, we have divided the topics into sections that will be relevant at different times during your book development process. Please refer back to these sections at the appropriate time for the relevant details. We welcome any questions or suggestions for other information that you would find useful.

### Contents

---

#### Book Development

1. Membership Eligibility & Requirements
2. Software
3. Technical Support
4. Confidential Information

#### Book Production

5. Trademarks and Registered Trademarks
6. The L-shaped Membrane Logo
7. Reprinting Copyrighted Material
8. Information for Your Readers

#### Book Promotion

9. Book Promotion
10. MATLAB® & Simulink® User Community

### The Book Program Team

---

The MathWorks Book Program team supports authors and publishers of books that will include MathWorks products. Please feel free to contact us with any questions you may have or if there is anything we can help you with.

**Courtney Esposito**  
**cesposito@mathworks.com**  
(508) 647-7428

**Naomi Fernandes**  
**naomif@mathworks.com**  
(508) 647-7632

The MathWorks, Inc., 3 Apple Hill Drive, Natick, MA 01760-2098  
[www.mathworks.com/support/books/](http://www.mathworks.com/support/books/)

## Book Development, Production, and Promotion Guidelines

### Book Development

---

#### 1. Membership Eligibility and Requirements

If you are writing a book that will include appropriate material on MathWorks products, you are eligible to join The MathWorks Book Program. To qualify for the Book Program, your text must include substantial MATLAB® or Simulink® material such as:

- » M-code samples written to illustrate examples throughout the book
- » A supplemental companion workbook with MATLAB® or Simulink® exercises
- » Author-written M-files that solve problems or recreate plots within the book
- » Supplemental electronic M-files or MDL-files available for the reader's use

Once you are accepted as a Book Program member, you must keep the Book Program team up-to-date on the progress of your book to continue to receive the benefits of the program. Please let us know when you reach milestones in your project such as signing with a publisher, setting a manuscript completion or publication date, and so forth. At a minimum, once a year you must confirm that your project is still active. We may occasionally send you a message requesting an update on your project, in which we will indicate that you must respond with the requested information to remain a member of the Book Program. Please be sure to respond to these messages by the deadline indicated.

#### 2. Software

As a member of the Book Program, if you have a signed contract with a publishing company and do not have access to the latest version of MATLAB® software, you are eligible to receive complimentary access to relevant MathWorks products while you are actively developing the book. If you have not yet signed with a publishing company, we can arrange an extended trial of the products for your book development.

Note: Complimentary software access provided by The MathWorks must be used solely for the creation of book material.

##### » Using the Current Version

Please check that you are developing your book in the most current version of MathWorks products so that your book will be up-to-date upon publication. Go to [www.mathworks.com/products/](http://www.mathworks.com/products/) to determine the current version, which is listed on the product's Web page. To determine which version you have installed, type `ver` at the MATLAB® command line. Please contact the Book Program team if you need access to the latest version.

##### » M-code across Platforms

Most MathWorks products are available on multiple platforms, including the Windows®, UNIX®, Linux®, and Macintosh® operating systems. M-files written on one platform should run on the other platforms without modifications. To check the system requirements for specific products, go to [www.mathworks.com/products/](http://www.mathworks.com/products/) to access the product's Web page.

##### » Writing Better M-code

Take advantage of the M-lint Code Check reports in MATLAB software to ensure that you are writing M-files with the appropriate MATLAB® syntax. The M-lint Code Check report will display potential errors and problems, as well as opportunities for improvement in your M-files. For more information on using M-lint, please visit: [www.mathworks.com/access/helpdesk/help/techdoc/ref/mlint.html](http://www.mathworks.com/access/helpdesk/help/techdoc/ref/mlint.html)

##### » Using Additional Products

The MathWorks offers numerous toolboxes and blocksets that extend the capabilities of the MATLAB® and Simulink® products. We encourage you to use all the products relevant to your book topic when developing the book material. We will be happy to discuss the product details with you and arrange complimentary access to the appropriate product set. For a full list of MathWorks products, please visit: [www.mathworks.com/products/](http://www.mathworks.com/products/)

Note: It is a good practice to list the set of required products prominently in your text so that readers are aware of the requirements.

## Book Development, Production, and Promotion Guidelines

### » Student Access to Additional Products

MathWorks products are readily accessible to students in the classroom and laboratory through university licenses and at home with MATLAB® & Simulink® Student Version. If you choose to use additional toolboxes and blocksets in your book, the majority of students will be able to obtain them and run the MATLAB® M-files or Simulink® models you create.

MATLAB® & Simulink® Student Version includes the MATLAB® and Simulink® products and symbolic math functions. It is a cost-effective way for students to access professional-quality software. In the MATLAB® & Simulink® Student Version, MATLAB® software has no matrix size limit and Simulink® software allows models sizes up to 1,000 blocks. Information on MATLAB® & Simulink® Student Version, including pricing and available add-on products, is available at [www.mathworks.com/academia/student\\_version/](http://www.mathworks.com/academia/student_version/)

### » Testing M-files in MATLAB® & Simulink® Student Version

With very few exceptions, there is no functional difference between the same releases of MATLAB® software and the MATLAB® & Simulink® Student Version. However, if you want to check how your files run in both versions, you can emulate the behavior of MATLAB® & Simulink® Student Version in the professional version of MATLAB® software with the following instructions:

#### – PC

Upon completion of the installation process, type `matlab -student` at the DOS prompt. Note that this command is case- and space-sensitive.

You can also launch the MATLAB® & Simulink® Student Version through the MATLAB® shortcut icon on your desktop. Right-click on the icon, select Properties, and add a space and `-student` to the end of the `matlab.exe` file name in the Target text field. Click OK. To emulate MATLAB® & Simulink® Student Version, double-click on the MATLAB® icon. To return to the professional version of MATLAB® software, remove the `-student` in the Properties/Target text field.

#### – Linux/Macintosh

Upon completion of the installation process, type `matlab -student` at the Linux system prompt. Note that this command is case- and space-sensitive.

Note: If you have a product installed that is not available in MATLAB® & Simulink® Student Version, you will receive an error message when you try to call a function from the restricted product.

### 3. Technical Support

A form is available for Book Program authors to use when requesting technical assistance. When submitting the form, please select the flag that identifies you as a member of the Book Program. This flag helps our technical staff to recognize your relationship to The MathWorks and assist you appropriately, and allows the Book Program team to track the status of your request. [www.mathworks.com/support/books/AuthorSupport.html](http://www.mathworks.com/support/books/AuthorSupport.html)

## Book Production

### 4. Treatment of Confidential Information

On occasion, the Book Program team may share confidential product information with you to help guide your book project. We will be explicit when we provide confidential information so that it will be clear what information should not be shared. All information regarding upcoming releases of MathWorks products, including product names, version numbers, and timing of the release, must remain confidential and should not be shared with anyone. If you feel that you need to communicate confidential information with someone, such as your publisher, you must get specific permission from the Book Program team in advance.

## Book Development, Production, and Promotion Guidelines

### 5. Trademarks and Registered Trademarks

The following are the current trademarks of The MathWorks:

**MATLAB®**

**Simulink®**

**Real-Time Workshop®**

**Stateflow®**

**xPC TargetBox®**

**Handle Graphics®**

Use the registered trademark symbol ® in all headers and titles (cover and title page) that reference any of the above trademarks. In addition, use the registered trademark symbol ® to mark the first occurrences of any of the above trademarks in each major section (e.g., preface, chapter, appendix) of the text.

The list of trademarks changes from time to time. To view the current list of trademarks, visit The MathWorks Web site: [www.mathworks.com/company/aboutus/policies\\_statements/trademarks.html](http://www.mathworks.com/company/aboutus/policies_statements/trademarks.html)

### Writing or Depicting Trademarks of The MathWorks

In all instances:

- » The word MATLAB® should appear in all capital letters.
- » Simulink® and Stateflow® should appear with an initial capital “S” and subsequent letters lowercase.
- » Real-Time Workshop® should appear with a capitalized “R,” “T,” and “W.” A hyphen should always be included between “real” and “time”: “Real-Time.”
- » xPC TargetBox® should appear with a lowercase “x” in “xPC,” the “PC” in uppercase, and capital “T” and “B” in TargetBox.
- » Handle Graphics® should always appear with a capitalized “H” and “G.”

### Using Trademarks of The MathWorks

- » Do not pluralize a trademark.  
Correct: How many Simulink® software licenses do you have?  
Incorrect: How many Simulinks® do you own?
- » Do not hyphenate a trademark.  
Correct: Applications based on the MATLAB® software environment  
Incorrect: MATLAB®-based applications
- » Do not abbreviate a trademark.  
Correct: Real-Time Workshop®  
Incorrect: RTW or RTW®
- » When using a trademark, keep the trademark intact on one line and do not divide with hyphens.
- » Do not use a possessive form of a trademark.  
Correct: the xPC TargetBox® system functions  
Incorrect: xPC TargetBox®’s functions
- » Use the exact form of the mark. Do not modify the mark, including the changing of capitalization or by the addition of prefix or suffix words, numbers, or symbols.

## Book Development, Production, and Promotion Guidelines

- » Do not use MATLAB® as a modifier for “Toolbox” or Simulink® for “Blockset.”

Correct: The Signal Processing Toolbox

Incorrect: The MATLAB® Signal Processing Toolbox

- » Do not use trademarks of The MathWorks in your domain names. You may use them in directory and file names after the domain name.

Correct: [www.company.com/product\\_name/MATLAB.html](http://www.company.com/product_name/MATLAB.html)

Incorrect: [www.myco-MATLAB.com](http://www.myco-MATLAB.com)

- » Always use trademarks of The MathWorks as adjectives modifying appropriate nouns that establish the product category. Do not use any trademark as a noun\* or a verb.

Correct: Stateflow® software works with Simulink® software

Incorrect: Stateflow® works with Simulink®

Correct: The Stateflow® product provides state charts

Incorrect: Stateflow® is available for state-charting.

The following nouns are preferred:

For MATLAB®, Simulink®, Stateflow®, and Real-Time Workshop®, use “software” or “product.”

For xPC TargetBox®, use “system.”

\*Note: Trademarks that are well-recognized may occasionally be used as nouns. MATLAB® and Simulink® are such well-recognized trademarks. Thus, in contexts where it is awkward to use the marks as adjectives it is acceptable for authors on occasion to use MATLAB® and Simulink® as nouns in their texts. Some examples include

- Book titles
- Chapter headings (including appendices)
- Section headers within chapters

This practice may also be applied to the body of the text itself, *but in all instances this practice should be limited to instances where the marks have already been used within a given document and the particular major sub-section of the text as adjectives describing generic nouns*. This practice is strictly limited to MATLAB® and Simulink®.

### Attribution

When your book cites any of The MathWorks trademarked products, you must attribute those trademarks. Please include the sentences from item (1) and/or (2) below as needed.

1. Append a specific trademark statement for The MathWorks products specifically mentioned.

For example:

- MATLAB® and Simulink® are registered trademarks of The MathWorks, Inc. (for use when your book cites MATLAB® and Simulink® software.)
- MATLAB®, Simulink®, Stateflow®, Handle Graphics®, Real-Time Workshop®, and xPC TargetBox® are registered trademarks of The MathWorks, Inc. (for use when your book cites the MATLAB®, Simulink®, Stateflow®, Handle Graphics®, and Real-Time Workshop® products and xPC TargetBox® system.)

2. Append a general trademark statement.

For example:

- Other product or brand names are trademarks or registered trademarks of their respective holders.

These statements may be appended to the copyright line of the book.

Please note that some MathWorks product names include products trademarked by other companies. You should follow the guidelines set forth by these companies for appropriately including trademark symbols and attribution for their trademarks.

## Book Development, Production, and Promotion Guidelines

### General Disclaimer

The following statement must be included on the copyright page or other appropriate location:

*MATLAB<sup>®</sup> is a trademark of The MathWorks, Inc. and is used with permission. The MathWorks does not warrant the accuracy of the text or exercises in this book. This book's use or discussion of MATLAB<sup>®</sup> software or related products does not constitute endorsement or sponsorship by The MathWorks of a particular pedagogical approach or particular use of the MATLAB<sup>®</sup> software.*

If your text discusses any other trademarked products, such as Simulink<sup>®</sup> or Stateflow<sup>®</sup>, include those trademarks in the first sentence as appropriate. For example:

*MATLAB<sup>®</sup>, Simulink<sup>®</sup>, and Stateflow<sup>®</sup> are trademarks of The Math Works, Inc. and are used with permission. The Math Works does not warrant the accuracy of the text or exercises in this book. This book's use or discussion of MATLAB<sup>®</sup>, Simulink<sup>®</sup>, and Stateflow<sup>®</sup> software or related products does not constitute endorsement or sponsorship by The Math Works of a particular pedagogical approach or particular use of the MATLAB<sup>®</sup>, Simulink<sup>®</sup>, and Stateflow<sup>®</sup> software.*

### Writing or Depicting Other Terms

- » For the correct spelling of our product names, please visit: [www.mathworks.com/products](http://www.mathworks.com/products)
- » Do not abbreviate the names of toolboxes and blocksets or any other MathWorks product names
  - Correct: The Signal Processing Toolbox is required for this product.
  - Incorrect: Signal Processing is required for this product.
- » When referring to a product that has already been referenced using its full name, it is acceptable to say “this blockset,” “the embedded target,” etc. without an initial cap.
- » Our company name should be written as The MathWorks, Inc. or The MathWorks. Please note that “The” is part of the title and that MathWorks is one word with capital “M” and “W.”
- » You may not use The MathWorks company logo without permission.
- » Do not divide with hyphens or across lines of text, the words The MathWorks or any other product names by The MathWorks.
- » Never make The MathWorks possessive by using an apostrophe or an apostrophe-s. Instead, please rewrite the sentence to avoid awkwardness.
- » Always use the appropriate hyphenation and capitalization of the terms “M-files,” “MEX-files,” and “MAT-files.”

### 6. The L-shaped Membrane Logo

The L-shaped membrane logo is a trademark of The MathWorks in continuous use since 1984. It has a high level of recognition as a logo of The MathWorks and its MATLAB<sup>®</sup> software. You may use this trademark in the margins of books to indicate content associated with MATLAB<sup>®</sup> software, so long as you adhere to the rules for usage defined in this document. Usage in any other manner is not authorized.

#### Acceptable Use of the L-shaped Membrane Logo

You may use the L-shaped membrane logo in the margins in the body of a book in association with text that uses or discusses MATLAB<sup>®</sup> software for an exercise or problem solution with the following conditions:

- » The L-shaped membrane logo and MATLAB<sup>®</sup> trademarks may only be depicted specifically in close association with an exercise/example for which a MATLAB<sup>®</sup> software-based solution is shown or suggested.

## Book Development, Production, and Promotion Guidelines

- » The L-shaped membrane logo must be depicted with proper color and proportions. Distortion of the aspect ratio is NOT permitted.
- » The L-shaped membrane logo used as an icon should not be smaller than 9 mm or larger than 1 in.
- » The L-shaped membrane logo image must be used in isolation, with no images or text of any kind directly associated with it visually within the margin area.
- » The text alongside the depiction of the L-shaped membrane logo must make reference to MATLAB® software so as to make it clear that the L-shaped membrane logo identifies MATLAB® software. This reference to MATLAB® software must be included in each exercise/example associated with the L-shaped membrane logo. This text should not be placed under or beside the L-shaped membrane logo in the margin area.

|            |                                                                                   |                                                                                                       |
|------------|-----------------------------------------------------------------------------------|-------------------------------------------------------------------------------------------------------|
| Correct:   |  | Computational exercise using MATLAB® software: Matrix inversion. Perform the following calculation... |
| Incorrect: |  | Computational exercise: Matrix inversion. Perform the following calculation...                        |

- » The book must include an explanation that the L-shaped membrane logo is used in the body of the book to indicate instances where MATLAB® software is used as part of an exercise or problem set.
- » When the L-shaped membrane logo is depicted within a book, the following notice must be included on the copyright page or other appropriate location instead of the General Disclaimer described above.

*The L-shaped membrane logo and MATLAB® are trademarks of The MathWorks, Inc. and are used with permission. The MathWorks does not warrant the accuracy of the text or exercises in this book. This book's use of the L-shaped membrane logo or use or discussion of MATLAB® software does not constitute endorsement or sponsorship by The MathWorks of a particular pedagogical approach or use of the MATLAB® software.*

As with the General Disclaimer discussed above, if your book discusses other trademarks of The MathWorks, they should be included in the first sentence as appropriate.

If you choose to include the L-shaped membrane logo in your book, you MUST agree to and abide by the above guidelines and submit an example of your proposed usage for review and approval. Further, you MUST use the image files provided by The MathWorks. Other forms, such as freehand illustration, downloading the image from a Web site, and recreating the L-shaped membrane in the MATLAB® software, are prohibited.

The artwork is provided electronically in several standard file formats and in both black-and-white and color versions. Please contact the Book Program team to make your request for the files and to submit your proposed usage.

### Prohibited Use of the L-shaped Membrane Logo

- » You may not use the L-shaped membrane logo or The MathWorks company logo (which includes the L-shaped membrane logo) on the cover or title page of a book, due to its close association with The MathWorks. Instead, you are encouraged to use any other relevant images that you create with MATLAB® software.
- » You may not use the L-shaped membrane logo or The MathWorks company logo (which includes the L-shaped membrane logo), on a Web site or in any promotional materials without written permission from The MathWorks.



## Book Development, Production, and Promotion Guidelines

### 7. Reprinting Copyrighted Material

#### M-files

- » You MAY list in the text or distribute the contents of files only if you created them.
- » You MAY refer to functions that are in MathWorks products.
- » You MAY NOT list in the text or distribute the contents of files that ship as part of any MathWorks products without permission from The MathWorks.

Note: When including code that you've developed in your text, please follow your own style guidelines for font. If no style exists, please format the code in a monospace font or other non-proportional font such as Courier. Code that shows what the user types at the MATLAB® command prompt should be indented and should not include the MATLAB® prompt (`>>`) in the code.

#### Images

You MAY NOT use images from The MathWorks Web site, documentation, software, packaging, etc. without our permission.

#### MathWorks Product Documentation

As a general rule, we do not grant authors permission to reprint or translate our documentation. Our documentation is widely available in print and on the Web, and we prefer that you simply refer the reader to that material.

#### Obtaining Reprint Permission

Send a reprint request to Courtney Esposito ([cesposito@mathworks.com](mailto:cesposito@mathworks.com)). Please include the name of the M-file or description of the image, the source, and how it will be used in your book.

### 8. Information for Your Readers

#### MathWorks Contact Information

Contact information for The MathWorks should be included in your book. Please use the following information:

For MATLAB® and Simulink® product information, please contact:

The MathWorks, Inc.  
3 Apple Hill Drive  
Natick, MA, 01760-2098 USA  
Tel: 508-647-7000  
Fax: 508-647-7001  
E-mail: [info@mathworks.com](mailto:info@mathworks.com)  
Web: [www.mathworks.com](http://www.mathworks.com)

#### Listing Product Names and Version Numbers

In your book and the companion software “readme” file, list the full name and version number of all MathWorks products that were used to create the book material. Listing all required products enables your readers to better use the book's examples and software.

- » To check the name and version number of the products installed on your license, type `ver` at the command line.
- » To determine which MathWorks products were used to create your book material, use the MATLAB® functions `depdir` and `depfun`. These functions list the dependent directories or functions of an M-file or P-file.

## Book Development, Production, and Promotion Guidelines

### Additional Reader Information

Feel free to include the following MathWorks Web resources in your book where appropriate:

- » The Academia area of The MathWorks Web site provides many resources for professors and students. Check there for contributed course materials, recommended products by curriculum, tutorials on MATLAB® and Simulink® software, and information on MATLAB® & Simulink® Student Version: [www.mathworks.com/products/academia/](http://www.mathworks.com/products/academia/)
- » MATLAB® Central is a MATLAB® & Simulink® user community that enables users to connect with each other, share files and ideas, and find other resources on MathWorks products: [www.mathworks.com/matlabcentral](http://www.mathworks.com/matlabcentral)

MATLAB® Central is divided into three areas: newsgroup access, file exchange, and link exchange.

- Newsgroup access connects you to the comp.soft.sys.MATLAB® newsgroup where you can connect with other users to ask technical questions and gather useful tips
  - The file exchange contains thousands of files contributed by users and MathWorks developers for download. The files are available in a wide range of application areas for your use and modification.
  - The link exchange includes links to hundreds of Web pages and resources with MATLAB® material. Check here for information on how others are using MATLAB® software in your area.
- » The Support area provides helpful information for troubleshooting technical questions, links and search features to product documentation and technical notes, and contact information for Technical Support and Customer Service at The MathWorks: [www.mathworks.com/support/](http://www.mathworks.com/support/)
  - » The MathWorks offers free Webinars that include product overviews and demonstrations. View the upcoming schedule or register for a Webinar at [www.mathworks.com/webinars](http://www.mathworks.com/webinars)

### Book Promotion

#### 9. Book Promotion

The MathWorks assists in the promotion of books as part of The MathWorks Book Program. All published books in the program receive a promotional page on the MathWorks Web site at: [www.mathworks.com/support/books](http://www.mathworks.com/support/books)

Some books receive additional promotion through our MATLAB® News & Notes newsletter, the MATLAB® Digest electronic newsletter, and various tradeshows.

In order to promote your book, the following FINAL book information is required:

- |                  |                                                |
|------------------|------------------------------------------------|
| • Title          | • ISBN                                         |
| • Author(s)      | • Brief description of book                    |
| • Publisher      | • Tel, Fax, E-mail for publisher to order book |
| • Copyright Year | • Location of companion software               |

To help us promote your book, we ask that you provide this information after your book is published using the form located at: [www.mathworks.com/support/books/promote.html](http://www.mathworks.com/support/books/promote.html)

In addition to this information, we must receive at least one copy of your text in order to evaluate the book for inclusion in the program and to draft the promotional Web page. In order for us to promote your book in our company display or other marketing materials, we request three copies of the book. Please make sure that your publisher sends promotional copies to Courtney Esposito upon publication of your book. Once promotional copies are received, the Web page for the book is usually live on our site within three months.

*These promotional efforts are subject to change without notice.*

## Book Development, Production, and Promotion Guidelines

### 10. MATLAB® & Simulink® User Community

For distributing book files, linking to your Web page, and connecting with other users

Take advantage of the many features of MATLAB® Central user community available to book authors:

» **Distribute your book files**

The MATLAB® Central file exchange contains thousands of files contributed by users and developers of MathWorks products. As a book author, you can distribute the files for your book in the “Companion Software for Books” section of the file exchange. Benefits of listing your files here include the ability to:

- track how often your files are downloaded
- receive user feedback via ratings and comments
- update and maintain your own files

To submit your files to the MATLAB Central file exchange, please refer to the detailed submission guidelines in the next section.

» **Link to your Web page**

The MATLAB® Central Link Exchange contains links to hundreds of Web sites and resources containing MATLAB® material contributed by other users. When you include links to your MATLAB® material, you will be able to track the number of visitors and receive user ratings. To submit a link to the link exchange, go to:

[www.mathworks.com/cgi-bin/matlab/add.cgi](http://www.mathworks.com/cgi-bin/matlab/add.cgi)

» **Connect with other users**

MATLAB® newsgroup access connects you to the comp.soft-sys.MATLAB® newsgroup where you can correspond with other users of MATLAB® software to ask technical questions, gather useful tips, or search for a book reviewer.

#### Software Distribution Guidelines for MATLAB Central

To include your files in the companion software section of the MATLAB® Central File Exchange, please observe the following guidelines:

- » Your book must be included in The MathWorks Book Program. If it is not, please contact the Book Program team so that we may evaluate your book for inclusion.
- » You must provide a valid e-mail address with your files. This information is used by customers and The MathWorks to communicate with you. (When submitting your files, note that you can choose whether or not your e-mail address displays on the site.)
- » The files submitted must not directly compete with products offered by The MathWorks.
- » The files submitted must not violate or infringe on any patent, copyright, or other intellectual property right of any other person.
- » The files you submit must be M-files, MAT-files, or Simulink® models and offered free of charge.
- » To submit a file, you must be the original author.
- » As the contributing author of the submission, you are solely responsible for the support and maintenance of the files. Submissions that receive numerous bug reports or are not maintained may be removed from the site.

*The MathWorks reserves the right to reject software from distribution on MATLAB® Central due to overlap of functionality with our products or for lack of adherence to the software distribution guidelines.*

## Book Development, Production, and Promotion Guidelines

### How to Submit a File

To submit your files to MATLAB® Central, go to:

[www.mathworks.com/matlabcentral/fileexchange/loadFile.do](http://www.mathworks.com/matlabcentral/fileexchange/loadFile.do)

When submitting your files, please refer to the guidelines for the following fields:

- » **Submission Name** - Should be the same name as your book. Include the edition number, but not the subtitle. Also, if your book is not in English, please enter the title in your local language.
- » **Category** - Select the appropriate category within the “Companion Software for Books” section from the pull-down menu. The files can be listed only under one category, and you should not resubmit the files under a different category.
- » **Attach File** - Attach your files as a .zip file.
- » **Screenshot** - Include an example or image created with your files. If you do not have an example screenshot, you can include the cover of your book.
- » **Author Details** - Please provide your first and last name and a valid e-mail address. We are able to include only one name with the files.

When your submission is included on MATLAB® Central it will be given a unique URL. You can include either this direct URL or the MATLAB® Central URL ([www.mathworks.com/matlabcentral](http://www.mathworks.com/matlabcentral)) in your book, or you can simply instruct the reader to go to MATLAB® Central on The MathWorks Web site.

Note: you should not provide explicit directions for navigating to MATLAB® Central from the MathWorks home page because this path is subject to change.

The Book Program team will automatically be notified when the supplemental files you submit are included on MATLAB® Central. We will then include a link on the book Web page to your companion software page on MATLAB Central. We will also include a link on MATLAB Central to your book Web page.
